# Supplementary material
Source: HighWire-hosted journal article supplement (https://erj.ersjournals.com/content/57/3/2000918)

# Accelerated FEV<sub>1</sub> decline and risk of cardiovascular disease and mortality in a primary care population of COPD patients

## Supplementary material

### Contents

|                                                                                                                                                                                                                                                                                            |    |
|--------------------------------------------------------------------------------------------------------------------------------------------------------------------------------------------------------------------------------------------------------------------------------------------|----|
| Table E1: Relationship between accelerated FEV1 decline and risk of composite CVD .....                                                                                                                                                                                                    | 1  |
| Table E2: Relationship between accelerated FEV1 decline and risk of heart failure .....                                                                                                                                                                                                    | 3  |
| Table E3: Relationship between accelerated FEV1 decline and risk of myocardial infarction .....                                                                                                                                                                                            | 4  |
| Table E4: Relationship between accelerated FEV1 decline and risk of stroke .....                                                                                                                                                                                                           | 5  |
| Table E5: Relationship between accelerated FEV1 decline and risk of atrial fibrillation.....                                                                                                                                                                                               | 6  |
| Table E6: Relationship between accelerated FEV1 decline and risk of coronary artery disease excluding myocardial infarction.....                                                                                                                                                           | 7  |
| Table E7: Relationship between accelerated FEV1 decline and risk of CVD death .....                                                                                                                                                                                                        | 8  |
| Table E8: Relationship between risk of CVD outcomes and accelerated FEV <sub>1</sub> decline (by quartiles, measured relative to baseline, measured as percent predicted, and linearly) .....                                                                                              | 9  |
| Table E9: Relationship between rate of FEV1 decline and risk of composite CVD .....                                                                                                                                                                                                        | 11 |
| Table E10: Relationship between accelerated FEV <sub>1</sub> decline and risk of composite CVD in patients without a history of asthma .....                                                                                                                                               | 12 |
| Table E11: Relationship between accelerated FEV1 decline and risk of GP diagnosed CVD, hospitalised CVD, and death from CVD.....                                                                                                                                                           | 13 |
| Table E12: Relationship between accelerated FEV1 decline and risk of composite CVD stratified by gender, age, smoking status, AECOPD, mMRC, and airflow obstruction .....                                                                                                                  | 14 |
| Table E13: Relationship between accelerated FEV1 decline and risk of composite CVD in patients with at least 4 FEV1 measurements during baseline period .....                                                                                                                              | 15 |
| Table E14: Relationship between accelerated FEV1 decline and risk of composite CVD in patients with at least 2 FEV1 measurements at least 2 years apart. ....                                                                                                                              | 16 |
| Figure E1: Number of FEV <sub>1</sub> measurements over the three-year baseline period (N=36,382) .....                                                                                                                                                                                    | 18 |
| Figure E2: Time intervals between FEV <sub>1</sub> measurements over the three-year baseline period.....                                                                                                                                                                                   | 19 |
| Figure E3: Spline regression with knots at the 10 <sup>th</sup> , 50 <sup>th</sup> , and 90 <sup>th</sup> percentile .....                                                                                                                                                                 | 20 |
| Figure E4: Association between composite CVD, heart failure, myocardial infarction, stroke, atrial fibrillation, and coronary artery disease and angina and accelerated FEV <sub>1</sub> decline compared to non-accelerated FEV <sub>1</sub> decline in the first year of follow-up. .... | 21 |
| Figure E5: Rate of CVD in patients with accelerated FEV1 decline compared to non-accelerated FEV1 decline using multiple CVD events (IRR 95% CI) .....                                                                                                                                     | 22 |

### Table E1: Relationship between accelerated FEV1 decline and risk of composite CVD

| Exposure and covariates                    | Unadjusted HR<br>95% CI | Adjusted HR*<br>(95% CI) |
|--------------------------------------------|-------------------------|--------------------------|
| <b>Accelerated FEV<sub>1</sub> decline</b> | 0.99 (0.93 – 1.05)      | 0.98 (0.90 – 1.06)       |
| <b>AECOPD</b>                              |                         |                          |
| None                                       | Ref                     | Ref                      |
| 1 moderate, 0 severe                       | 1.05 (0.98 – 1.13)      | 1.06 (0.97 – 1.17)       |
| 2 moderate, 0 severe                       | 1.14 (1.05 – 1.23)*     | 1.12 (1.00 – 1.26)*      |
| ≥3 moderate, 0 severe                      | 1.26 (1.17 – 1.35)**    | 1.29 (1.17 – 1.43)**     |
| 1 severe, any moderate                     | 1.90 (1.70 – 2.13)**    | 1.78 (1.52 – 2.08)**     |
| ≥2 severe, any moderate                    | 2.59 (2.13 – 3.16)**    | 2.15 (1.61 – 2.86)**     |
| <b>FEV1 % predicted</b>                    |                         |                          |
| >80%                                       | Ref                     | Ref                      |
| 50-80%                                     | 1.05 (0.98 – 1.12)      | 1.06 (0.96 – 1.16)       |
| 30-50%                                     | 1.15 (1.07 – 1.24)**    | 1.02 (0.92 – 1.14)       |
| <30%                                       | 1.23 (1.10 – 1.38)**    | 1.10 (0.93 – 1.30)       |
| <b>Age</b>                                 | 1.05 (1.04 – 1.05)**    | 1.04 (1.04 – 1.05)**     |
| <b>Men</b>                                 | 1.33 (1.27 – 1.40)**    | 1.40 (1.29 – 1.51)**     |
| <b>Current smokers</b>                     | 0.83 (0.78 – 0.87)**    | 1.13 (1.05 – 1.22)*      |
| <b>BMI</b>                                 |                         |                          |
| Normal                                     | Ref                     | Ref                      |
| Underweight                                | 1.04 (0.91 – 1.20)      | 1.08 (0.89 – 1.30)       |
| Overweight                                 | 1.10 (1.03 – 1.18)*     | 1.01 (0.93 – 1.10)       |
| Obese                                      | 1.11 (1.04 – 1.19)**    | 1.09 (0.99 – 1.19)       |
| <b>mMRC</b>                                |                         |                          |
| 0                                          | Ref                     | Ref                      |
| 1                                          | 1.18 (1.07 – 1.30)*     | 1.05 (0.95 – 1.17)       |
| 2                                          | 1.50 (1.35 – 1.66)**    | 1.24 (1.11 – 1.38)**     |
| 3                                          | 1.94 (1.73 – 2.18)**    | 1.50 (1.32 – 1.71)**     |
| 4                                          | 2.27 (1.82 – 2.82)**    | 1.51 (1.19 – 1.92)*      |
| <b>Asthma</b>                              | 0.91 (0.87 – 0.96)**    | 1.02 (0.95 – 1.10)       |
| <b>Hypertension</b>                        | 1.66 (1.58 – 1.74)**    | 1.31 (1.21 – 1.41)**     |
| <b>Diabetes</b>                            | 1.39 (1.30 – 1.50)**    | 1.09 (0.99 – 1.21)       |
| <b>Statin use</b>                          | 1.40 (1.33 – 1.47)**    | 1.14 (1.05 – 1.23)*      |

\*p value <0.05; \*\*p value<0.0001

Table E2: Relationship between accelerated FEV1 decline and risk of heart failure

| Exposure and covariates                    | Unadjusted HR<br>95% CI | Adjusted HR*<br>(95% CI) |
|--------------------------------------------|-------------------------|--------------------------|
| <b>Accelerated FEV<sub>1</sub> decline</b> | 1.01 (0.89 – 1.15)      | 0.99 (0.83 – 1.20)       |
| <b>AECOPD</b>                              |                         |                          |
| None                                       | Ref                     | Ref                      |
| 1 moderate, 0 severe                       | 1.09 (0.93 – 1.27)      | 0.97 (0.78 – 1.22)       |
| 2 moderate, 0 severe                       | 1.12 (0.93 – 1.34)      | 1.22 (0.95 – 1.57)       |
| ≥3 moderate, 0 severe                      | 1.47 (1.26 – 1.72)**    | 1.46 (1.17 – 1.82)*      |
| 1 severe, any moderate                     | 2.72 (2.18 – 3.40)**    | 2.22 (1.62 – 3.02)**     |
| ≥2 severe, any moderate                    | 2.54 (1.60 – 4.02)**    | 1.60 (0.81 – 3.16)       |
| <b>FEV1 % predicted</b>                    |                         |                          |
| >80%                                       | Ref                     | Ref                      |
| 50-80%                                     | 1.18 (1.00 – 1.39)*     | 1.21 (0.97 – 1.52)       |
| 30-50%                                     | 1.74 (1.48 – 2.06)**    | 1.55 (1.21 – 1.98)*      |
| <30%                                       | 2.07 (1.64 – 2.62)**    | 1.91 (1.34 – 2.70)**     |
| <b>Age</b>                                 | 1.06 (1.05 – 1.07)**    | 1.10 (1.05 – 1.07)**     |
| <b>Men</b>                                 | 1.23 (1.10 – 1.38)**    | 1.61 (1.36 – 1.91)**     |
| <b>Current smokers</b>                     | 0.79 (0.70 – 0.88)**    | 1.15 (0.97 – 1.36)       |
| <b>BMI</b>                                 |                         |                          |
| Normal                                     | Ref                     | Ref                      |
| Underweight                                | 1.27 (0.94 – 1.70)      | 1.19 (0.80 – 1.78)       |
| Overweight                                 | 1.02 (0.87 – 1.18)      | 0.89 (0.72 – 1.09)       |
| Obese                                      | 1.35 (1.16 – 1.56)**    | 1.31 (1.07 – 1.62)*      |
| <b>mMRC</b>                                |                         |                          |
| 0                                          | Ref                     | Ref                      |
| 1                                          | 1.39 (1.08 – 1.78)*     | 1.19 (0.91 – 1.55)       |
| 2                                          | 2.27 (1.73 – 2.87)**    | 1.60 (1.22 – 2.11)*      |
| 3                                          | 3.23 (2.47 – 4.23)**    | 1.94 (1.44 – 2.63)**     |
| 4                                          | 4.49 (2.91 – 6.93)**    | 2.10 (1.30 – 3.40)*      |
| <b>Asthma</b>                              | 0.85 (0.76 – 0.95)*     | 0.88 (0.74 – 1.04)       |
| <b>Hypertension</b>                        | 2.30 (2.05 – 2.58)**    | 1.70 (1.42 – 2.03)**     |
| <b>Diabetes</b>                            | 1.78 (1.54 – 2.07)**    | 1.25 (1.00-1.56)*        |
| <b>Statin use</b>                          | 1.43 (1.27 – 1.60)**    | 0.97 (0.81 – 1.16)       |

\*p value &lt;0.05; \*\*p value&lt;0.0001

Table E3: Relationship between accelerated FEV1 decline and risk of myocardial infarction

| Exposure and covariates                    | Unadjusted HR<br>95% CI | Adjusted HR*<br>(95% CI) |
|--------------------------------------------|-------------------------|--------------------------|
| <b>Accelerated FEV<sub>1</sub> decline</b> | 1.02 (0.87 – 1.19)      | 0.89 (0.70 – 1.12)       |
| <b>AECOPD</b>                              |                         |                          |
| None                                       | Ref                     | Ref                      |
| 1 moderate, 0 severe                       | 1.07 (0.89 – 1.29)      | 1.21 (0.94 – 1.56)       |
| 2 moderate, 0 severe                       | 1.10 (0.88 – 1.37)      | 1.13 (0.83 – 1.55)       |
| ≥3 moderate, 0 severe                      | 1.44 (1.20– 1.74)**     | 1.38 (1.04 – 1.81)*      |
| 1 severe, any moderate                     | 2.19 (1.63 – 2.94)**    | 1.57 (1.01 – 2.45)*      |
| ≥2 severe, any moderate                    | 3.49 (2.16 – 5.62)**    | 2.58 (1.29 – 5.16)*      |
| <b>FEV1 % predicted</b>                    |                         |                          |
| >80%                                       | Ref                     | Ref                      |
| 50-80%                                     | 1.01 (0.84 – 1.21)      | 1.08 (0.83 – 1.40)       |
| 30-50%                                     | 1.30 (1.08 – 1.58)*     | 1.18 (0.88 – 1.59)       |
| <30%                                       | 1.31 (0.97 – 1.78)      | 1.08 (0.68 – 1.72)       |
| <b>Age</b>                                 | 1.04(1.03 – 1.04)**     | 0.14 (2.03 -1.05)**      |
| <b>Men</b>                                 | 1.50 (1.31 -1.72)**     | 1.44(1.17 – 1.77)*       |
| <b>Current smokers</b>                     | 1.09(0.95 – 1.26)       | 1.45 (1.17 – 1.81)*      |
| <b>BMI</b>                                 |                         |                          |
| Normal                                     | Ref                     | Ref                      |
| Underweight                                | 1.36 (0.98 – 1.88)      | 1.43 (0.94 – 2.17)       |
| Overweight                                 | 0.97 (0.82 – 1.16)      | 0.87 (0.69 – 1.10)       |
| Obese                                      | 0.76 (0.63 – 0.93)*     | 0.69 (0.53- 0.91)*       |
| <b>mMRC</b>                                |                         |                          |
| 0                                          | Ref                     | Ref                      |
| 1                                          | 1.23 (0.92- 1.63)       | 1.14 (0.85 – 1.54)       |
| 2                                          | 1.65 (1.23-2.21)*       | 1.45 (1.06 – 1.99)*      |
| 3                                          | 2.50 (1.82 – 3.44)**    | 2.11(1.48 – 2.99)**      |
| 4                                          | 2.85 (1.60 -5.06)**     | 2.07 (1.11 – 3.7)*       |
| <b>Asthma</b>                              | 0.90 (0.79 – 1.03)      | 1.07 (0.88 – 1.31)       |
| <b>Hypertension</b>                        | 1.21 (1.06 – 1.39)*     | 1.08 (0.88 – 1.34)       |
| <b>Diabetes</b>                            | 1.30 (1.06 – 1.60)*     | 1.03(1.11 – 3.87)*       |
| <b>Statin use</b>                          | 1.01 (0.87 – 1.17)      | 1.16 (0.93 -1.44)        |

\*p value &lt;0.05; \*\*p value&lt;0.0001

| Exposure and covariates                    | Unadjusted HR<br>95% CI | Adjusted HR*<br>(95% CI) |
|--------------------------------------------|-------------------------|--------------------------|
| <b>Accelerated FEV<sub>1</sub> decline</b> | 0.99 (0.86- 1.14)       | 1.01(0.82- 1.23)         |
| <b>AECOPD</b>                              |                         |                          |
| None                                       | Ref                     | Ref                      |
| 1 moderate, 0 severe                       | 0.97 (0.82 – 1.14)      | 1.01 (0.81- 1.27)        |
| 2 moderate, 0 severe                       | 1.23 (1.03 – 1.47)*     | 1.06 (0.81- 1.39)        |
| ≥3 moderate, 0 severe                      | 1.00 (0.84 – 1.20)      | 1.14 (0.88 – 1.46)       |
| 1 severe, any moderate                     | 1.58 (1.19 -2.11)*      | 1.54 (1.04 – 2.29)*      |
| ≥2 severe, any moderate                    | 2.50 (1.56 – 4.01)**    | 1.22 (0.50 – 3.01)       |
| <b>FEV1 % predicted</b>                    |                         |                          |
| >80%                                       | Ref                     | Ref                      |
| 50-80%                                     | 1.16 (0.99 – 1.36)      | 1.20 (0.95 – 1.50)       |
| 30-50%                                     | 1.07 (0.90 – 1.28)      | 1.03 (0.79 – 1.36)       |
| <30%                                       | 1.28 (0.97 – 1.68)      | 1.26 (0.83-1.91)         |
| <b>Age</b>                                 | 1.06 (1.05 – 1.06)**    | 1.05 (1.04 – 1.06)**     |
| <b>Men</b>                                 | 1.24 (1.10 – 1.40)*     | 1.29 (1.07 – 1.55)*      |
| <b>Current smokers</b>                     | 0.87 (0.77 – 0.98)*     | 1.24 (1.03 – 1.50)*      |
| <b>BMI</b>                                 |                         |                          |
| Normal                                     | Ref                     | Ref                      |
| Underweight                                | 0.83 (0.59 – 1.17)      | 0.85 (0.54 – 1.35)       |
| Overweight                                 | 0.97 (0.83-1.12)        | 0.97 (0.80 – 1.18)       |
| Obese                                      | 0.63 (0.53 – 0.76)**    | 0.65 (0.51-0.84)*        |
| <b>mMRC</b>                                |                         |                          |
| 0                                          | Ref                     | Ref                      |
| 1                                          | 1.09 (0.87 – 1.36)      | 0.96 (0.76 – 1.22)       |
| 2                                          | 1.17 (0.91 – 1.49)      | 0.94 (0.72 – 1.24)       |
| 3                                          | 1.62 (1.23 -2.14)*      | 1.31 (0.96 – 1.78)       |
| 4                                          | 2.27 (1.38 – 3.74)*     | 1.56 (0.89 – 2.75)       |
| <b>Asthma</b>                              | 0.77 (0.68 – 0.87)**    | 0.82(0.68 – 0.99)*       |
| <b>Hypertension</b>                        | 1.37 (1.22 – 1.55)**    | 1.00 (0.83 – 1.21)       |

Table E4:  
Relationship  
between accelerated  
FEV1 decline and  
risk of stroke

|                   |                      |                    |
|-------------------|----------------------|--------------------|
| <b>Diabetes</b>   | 1.23 (1.03 – 1.48)*  | 1.23 (0.94-1.61)   |
| <b>Statin use</b> | 2.30 (1.14 – 1.47)** | 0.97 (0.80 – 1.19) |

\*p value <0.05; \*\*p value<0.0001

Table E5: Relationship between accelerated FEV1 decline and risk of atrial fibrillation

| <b>Exposure and covariates</b>             | <b>Unadjusted HR<br/>95% CI</b> | <b>Adjusted HR*<br/>(95% CI)</b> |
|--------------------------------------------|---------------------------------|----------------------------------|
| <b>Accelerated FEV<sub>1</sub> decline</b> | 0.92(0.82-1.04)                 | 0.97 (0.81 -1.15)                |
| <b>AECOPD</b>                              |                                 |                                  |
| None                                       | Ref                             | Ref                              |
| 1 moderate, 0 severe                       | 1.14 (0.99 – 1.30)              | 1.06 (0.87 – 1.28)               |
| 2 moderate, 0 severe                       | 1.12 (0.95 – 1.32)              | 1.06 (0.83- 1.34)                |
| ≥3 moderate, 0 severe                      | 1.27 (1.10-1.47)*               | 1.31 (1.07 – 1.61)*              |
|                                            | 1.57 (1.22 – 2.03)*             | 1.53 (1.07 – 2.17)*              |

|                                                   |                      |                      |
|---------------------------------------------------|----------------------|----------------------|
| 1 severe, any moderate<br>≥2 severe, any moderate | 2.56 (1.68- 3.88)**  | 2.64 (1.49 – 4.66)*  |
| <b>FEV1 % predicted</b>                           |                      |                      |
| >80%                                              | Ref                  | Ref                  |
| 50-80%                                            | 1.11 (0.97 – 1.28)   | 1.06 (0.88 – 1.28)   |
| 30-50%                                            | 1.26 (1.09-1.46)*    | 1.09(0.87 – 1.36)    |
| <30%                                              | 1.20(0.94 – 1.53)    | 1.09 (0.75 -1.60)    |
| <b>Age</b>                                        | 1.07 (1.06 – 1.07)** | 1.07 (1.06 – 1.-8)** |
| <b>Men</b>                                        | 1.39 (1.25 – 1.54)** | 1.44 (1.23- 1.68)**  |
| <b>Current smokers</b>                            | 0.61 (0.55 – 0.68)** | 0.91 (0.78 – 1.06)   |
| <b>BMI</b>                                        |                      |                      |
| Normal                                            | Ref                  | Ref                  |
| Underweight                                       | 0.95 (0.69 -1.32)    | 1.28 (0.84 – 1.93)   |
| Overweight                                        | 1.29 (1.12-1.48)**   | 1.26 (1.05- 1.52)*   |
| Obese                                             | 1.37 (1.18 – 1.58)** | 1.50 (1.23 – 1.83)** |
| <b>mMRC</b>                                       |                      |                      |
| 0                                                 | Ref                  | Ref                  |
| 1                                                 | 1.11 (0.91 -1.34)    | 0.98 (0.79 – 1.20)   |
| 2                                                 | 1.36 (1.11 – 1.66)*  | 1.06(0.85 – 1.33)    |
| 3                                                 | 1.43 (1.12 – 1.82)*  | 1.03 (0.78 – 1.37)   |
| 4                                                 | 1.75 (1.09 – 2.82)*  | 1.16 (0.69 – 1.93)   |
| <b>Asthma</b>                                     | 0.01 (0.82-1.01)     | 1.09 (0.94-1.27)     |
| <b>Hypertension</b>                               | 1.82 (1.64 – 2.12)** | 1.42 (1.21- 1.67)**  |
| <b>Diabetes</b>                                   | 1.25 (1.07 -1.46)*   | 1.09 (0.88 – 1.35)   |
| <b>Statin use</b>                                 | 1.25 (1.12- 1.40)**  | 0.99 (0.84-1.16)     |

\*p value <0.05; \*\*p value<0.0001

Table E6: Relationship between accelerated FEV1 decline and risk of coronary artery disease excluding myocardial infarction

| Exposure and covariates                    | Unadjusted HR<br>95% CI | Adjusted HR*<br>(95% CI) |
|--------------------------------------------|-------------------------|--------------------------|
| <b>Accelerated FEV<sub>1</sub> decline</b> | 1.03(0.93-1.15)         | 1.02(0.87 – 1.19)        |
| <b>AECOPD</b>                              |                         |                          |
| None                                       | Ref                     | Ref                      |
| 1 moderate, 0 severe                       | 0.98 (0.87 – 1.12)      | 1.11 (0.93 – 1.32)       |
| 2 moderate, 0 severe                       | 1.09 (0.94- 1.26)       | 1.18 (0.96 – 1.44)       |
| ≥3 moderate, 0 severe                      | 1.14 (1.00 – 1.31)*     | 1.20 (0.99 – 1.45)       |
| 1 severe, any moderate                     | 1.64 (1.32 -2.04)**     | 1.86 (1.39 – 2.50)**     |
| ≥2 severe, any moderate                    | 2.17 (1.46 - 3.21)**    | 2.69 (1.61 – 4.49)**     |
| <b>FEV1 % predicted</b>                    |                         |                          |
| >80%                                       | Ref                     | Ref                      |
| 50-80%                                     | 0.90 (0.80 – 1.01)      | 0.91 (0.77 – 1.07)       |
| 30-50%                                     | 0.77 (0.68 – 0.89)**    | 0.68 (0.56 – 0.84)**     |
| <30%                                       | 0.82 (0.66 – 1.03)      | 0.70 (0.50- 0.99)*       |
| <b>Age</b>                                 | 1.02 (1.02 -1.02)**     | 1.02 (0.87 – 1.19)       |
| <b>Men</b>                                 | 1.28 (1.25 -1.52)**     | 1.33 (1.15 – 1.53)*      |
| <b>Current smokers</b>                     | 0.97 (0.88- 1.07)       | 1.31 (1.04 -1.39)*       |
| <b>BMI</b>                                 |                         |                          |
| Normal                                     | Ref                     | Ref                      |
| Underweight                                | 0.94 (0.71 -1.25)       | 0.74 (0.47 – 1.16)       |
| Overweight                                 | 1.17 (1.03-1.33)*       | 1.02 (0.87 – 1.20)       |
| Obese                                      | 1.27 (1.12- 1.45)**     | 1.13 (0.95 – 1.35)       |
| <b>mMRC</b>                                |                         |                          |
| 0                                          | Ref                     | 1.05 (0.87 – 1.27)       |
| 1                                          | 1.14 (0.95 – 1.37)      | 1.30 (1.06 -1.60)*       |
| 2                                          | 1.43 (1.18 – 1.73)**    | 1.59 (1.26 – 2.01)**     |
| 3                                          | 1.77 (1.43 – 2.20)**    | 1.04 (0.60 – 1.79)       |
| 4                                          | 1.26 (0.75 – 2.10)      |                          |
| <b>Asthma</b>                              | 1.07 (0.97 – 1.18)      | 1.17(1.03 -1.34)*        |
| <b>Hypertension</b>                        | 1.61 (1.46 – 1.77)**    | 1.32 (1.14 – 1.53)**     |
| <b>Diabetes</b>                            | 1.42 (1.24 – 1.63)**    | 0.94 (0.78 – 1.15)       |
| <b>Statin use</b>                          | 1.80 (1.64 – 1.99)**    | 1.60 (1.39 – 1.85)**     |

\*p value <0.05; \*\*p  
value<0.0001

Table E7: Relationship between accelerated FEV1 decline and risk of CVD death

| Exposure and covariates                    | Unadjusted HR<br>95% CI | Adjusted HR*<br>(95% CI) |
|--------------------------------------------|-------------------------|--------------------------|
| <b>Accelerated FEV<sub>1</sub> decline</b> | 0.96 (0.79-1.17)        | 0.94 (0.71-1.25)         |



|                         |                    |                    |
|-------------------------|--------------------|--------------------|
| <b>AECOPD</b>           |                    |                    |
| None                    | Ref                | Ref                |
| 1 moderate, 0 severe    | 1.12 (0.90-1.39)   | 1.19 (0.89-1.61)   |
| 2 moderate, 0 severe    | 1.06 (0.90-1.38)   | 1.13 (0.78-1.63)   |
| ≥3 moderate, 0 severe   | 1.03 (0.81-1.31)   | 0.73 (0.50-1.09)   |
| 1 severe, any moderate  | 2.61 (0.80-1.61)** | 1.94 (1.24-3.05)*  |
| ≥2 severe, any moderate | 2.13 (1.90-4.34)*  | 0.91 (0.29-2.92)   |
| <b>FEV1 % predicted</b> |                    |                    |
| >80%                    | Ref                | Ref                |
| 50-80%                  | 1.23 (0.97-1.57)   | 1.12 (0.81-1.54)   |
| 30-50%                  | 1.87 (1.46-2.40)** | 1.23 (0.86-1.77)   |
| <30%                    | 2.18 (1.53-3.09)** | 1.40 (0.83-2.38)   |
| <b>Age</b>              | 1.06 (1.05-1.08)** | 1.06 (1.04-1.07)** |
| <b>Men</b>              | 1.50 (1.26-1.78)** | 1.80 (1.40-2.32)** |
| <b>Current smokers</b>  | 1.08 (0.91-1.29)   | 1.62 (1.24-2.10)** |
| <b>BMI</b>              |                    |                    |
| Normal                  | Ref                | Ref                |
| Underweight             | 1.28 (0.87-1.89)   | 1.03 (0.59-1.81)   |
| Overweight              | 0.73 (0.59-0.92)*  | 0.63 (0.47-0.86)*  |
| Obese                   | 0.84 (0.67-1.06)   | 0.94 (0.70-1.27)   |
| <b>mMRC</b>             |                    |                    |
| 0                       | Ref                | Ref                |
| 1                       | 1.08 (0.75-1.55)   | 0.94 (0.64-1.39)   |
| 2                       | 2.02 (1.41-2.89)   | 1.57 (1.06-2.32)*  |
| 3                       | 3.16 (2.16-4.63)   | 2.52 (1.66-3.83)** |
| 4                       | 5.15 (2.90-9.16)   | 2.94 (1.52-5.69)*  |
| <b>Asthma</b>           | 0.78 (0.66-0.93)*  | 0.80 (0.62-1.03)   |
| <b>Hypertension</b>     | 1.83 (1.55-2.16)** | 1.49 (1.15-1.93)*  |
| <b>Diabetes</b>         | 1.62 (1.29-2.04)** | 0.90 (0.63-1.29)   |
| <b>Statin use</b>       | 1.27 (1.-7-1.51)*  | 1.17 (0.90-1.52)   |

\*p value <0.05; \*\*p value<0.0001

Table E8: Relationship between risk of CVD outcomes and accelerated FEV<sub>1</sub> decline (by quartiles, measured relative to baseline, measured as percent predicted, and linearly)

| Model                                   | Unadjusted HR (95% CI) | Adjusted HR (95% CI) |
|-----------------------------------------|------------------------|----------------------|
| Quartile 1 (slowest decline)            | Ref                    | Ref                  |
| Quartile 2                              | 1.05 (0.98 – 1.13)     | 0.96 (0.87 – 1.06)   |
| Quartile 3                              | 1.06 (0.98 – 1.14)     | 0.96 (0.87 – 1.06)   |
| Quartile 4 (accelerated decline)        | 1.02 (0.95– 1.10)      | 0.95 (0.85 – 1.05)   |
| Decline in relative FEV <sub>1</sub>    | 1.06 (1.00 – 1.13)     | 1.00 (0.91 – 1.09)   |
| Decline in FEV <sub>1</sub> % predicted | 1.05 (0.98 – 1.13)     | 1.00 (0.90 – 1.11)   |
| Linear FEV <sub>1</sub> decline         | 1.00 (1.00 – 1.00)     | 1.00 (1.00 – 1.00)   |

\*p value

\*\*p

<0.05;

value<0.0001

Table E9: Relationship between rate of FEV1 decline and risk of composite CVD

| Exposure and covariates | Unadjusted HR<br>95% CI | Adjusted HR*<br>(95% CI) |
|-------------------------|-------------------------|--------------------------|
| <b>Decline</b>          |                         |                          |
| >-20ml/year             | Ref                     | Ref                      |
| -20 to -40 ml/year      | 1.05 (0.99 – 1.12)      | 1.00 (0.91 - 1.09)       |
| -40 to -60ml/year       | 0.98(0.91 – 1.07)       | 0.91 (0.81-1.02)         |
| <-60ml                  | 1.01 (0.93 – 1.09)      | 1.02 (0.91 – 1.14)       |
| <b>AECOPD</b>           |                         |                          |
| None                    | Ref                     | Ref                      |
| 1 moderate, 0 severe    | 1.05 (0.98 – 1.13)      | 1.06 (0.97 – 1.17)       |
| 2 moderate, 0 severe    | 1.14 (1.05 – 1.23)*     | 1.12 (1.00 – 1.26)*      |
| ≥3 moderate, 0 severe   | 1.26 (1.17 – 1.35)**    | 1.29 (1.17 – 1.43)**     |
| 1 severe, any moderate  | 1.90 (1.70 – 2.13)**    | 1.78 (1.52 – 2.08)**     |
| ≥2 severe, any moderate | 2.59 (2.13 – 3.16)**    | 2.15 (1.61 – 2.86)**     |
| <b>FEV1 % predicted</b> |                         |                          |
| >80%                    | Ref                     | Ref                      |
| 50-80%                  | 1.05 (0.98 – 1.12)      | 1.06 (0.96 – 1.16)       |
| 30-50%                  | 1.15 (1.07 – 1.24)**    | 1.02 (0.92 – 1.14)       |
| <30%                    | 1.23 (1.10 – 1.38)**    | 1.10 (0.92 – 1.30)       |
| <b>Age</b>              | 1.05 (1.04 – 1.05)**    | 1.04 (1.04 – 1.05)**     |
| <b>Men</b>              | 1.33 (1.27 – 1.40)**    | 1.39 (1.29 – 1.50)**     |
| <b>Current smokers</b>  | 0.83 (0.78 – 0.87)**    | 1.13 (1.05 – 1.22)*      |
| <b>BMI</b>              |                         |                          |
| Normal                  | Ref                     | Ref                      |
| Underweight             | 1.04 (0.91 – 1.20)      | 1.08 (0.89 – 1.30)       |
| Overweight              | 1.10 (1.03 – 1.18)*     | 1.01 (0.93 – 1.10)       |
| Obese                   | 1.11 (1.04 – 1.19)**    | 1.08 (0.99 – 1.19)       |
| <b>mMRC</b>             |                         |                          |
| 0                       | Ref                     | Ref                      |
| 1                       | 1.18 (1.07 – 1.30)*     | 1.05 (0.95 – 1.17)       |
| 2                       | 1.50 (1.35 – 1.66)**    | 1.24 (1.10 – 1.38)**     |
| 3                       | 1.94 (1.73 – 2.18)**    | 1.50 (1.32 – 1.71)**     |
| 4                       | 2.27 (1.82 – 2.82)**    | 1.52 (1.19 – 1.92)*      |
| <b>Asthma</b>           | 0.91 (0.87 – 0.96)**    | 1.02 (0.95 – 1.10)       |
| <b>Hypertension</b>     | 1.66 (1.58 – 1.74)**    | 1.31 (1.21 – 1.41)**     |
| <b>Diabetes</b>         | 1.39 (1.30 – 1.50)**    | 1.09 (0.99 – 1.21)       |
| <b>Statin use</b>       | 1.40 (1.33 – 1.47)**    | 1.14 (1.05 – 1.23)*      |

\*p value &lt;0.05; \*\*p value&lt;0.0001

Table E10: Relationship between accelerated FEV<sub>1</sub> decline and risk of composite CVD in patients without a history of asthma

| Model                    | Unadjusted HR (95% CI) | Adjusted HR (95% CI) |
|--------------------------|------------------------|----------------------|
| Accelerated FEV1 decline | 0.98 (0.90 – 1.07)     | 0.96 (0.85 – 1.08)   |

\*p value <0.05; \*\*p value<0.0001

| Model            | Crude HR (95% CI)  | Adjusted HR (95% CI) |
|------------------|--------------------|----------------------|
| GP diagnosed CVD | 0.96 (0.89 – 1.04) | 0.93 (0.83 – 1.05)   |
| Hospitalised CVD | 1.02 (0.90 – 1.16) | 0.96 (0.79 – 1.16)   |
| Death from CVD   | 0.96 (0.70 – 1.17) | 0.94 (0.71 – 1.25)   |

Table E11: Relationship between accelerated FEV1 decline and risk of GP diagnosed CVD, hospitalised CVD, and death from CVD

\*p value <0.05; \*\*p value<0.0001

| Model                                    | Crude HR (95% CI)  | Adjusted HR (95% CI) |
|------------------------------------------|--------------------|----------------------|
| Males                                    | 0.93 (0.85 – 1.03) | 0.98 (0.85 – 1.12)   |
| Females                                  | 0.97 (0.90 – 1.04) | 0.98 (0.88 – 1.09)   |
| <b>Stratified by age</b>                 |                    |                      |
| 35-50                                    | 0.92 (0.62 – 1.38) | 0.58 (0.30 – 1.12)   |
| 50-65                                    | 1.07 (0.95 – 1.20) | 1.02 (0.86 – 1.21)   |
| 65-80                                    | 1.04 (0.96 – 1.13) | 0.91 (0.81 – 1.02)   |
| 80≤                                      | 1.15 (1.00 – 1.32) | 1.11 (0.92 – 1.35)   |
| <b>Stratified by smoking status</b>      |                    |                      |
| Ex-smoker                                | 0.94 (0.86 – 1.03) | 0.93 (0.81 – 1.07)   |
| Current smoker                           | 1.03 (0.96 – 1.11) | 1.00 (0.89 – 1.11)   |
| <b>Stratified by AECOPD</b>              |                    |                      |
| 0, 1, or 2 mod & no severe               | 0.98 (0.92 – 1.05) | 0.98 (0.89 – 1.09)   |
| 3 mod & no severe <u>or</u> any severe   | 0.98 (0.88 – 1.09) | 0.99 (0.84 – 1.16)   |
| <b>Stratified by mMRC</b>                |                    |                      |
| 0                                        | 1.05 (0.86 – 1.27) | 1.02 (0.82 – 1.26)   |
| 1                                        | 1.00 (0.88 – 1.14) | 0.98 (0.85 – 1.12)   |
| 2                                        | 0.94 (0.81 – 1.09) | 0.99 (0.84 – 1.16)   |
| 3                                        | 0.89 (0.73 – 1.08) | 0.95 (0.77 – 1.17)   |
| 4                                        | 0.73 (0.46 – 1.16) | 0.73 (0.44 – 1.21)   |
| <b>Stratified by airflow obstruction</b> |                    |                      |
| ≥80% FEV <sub>1</sub> predicted          | 1.01 (0.88 – 1.16) | 0.97 (0.83 – 1.12)   |
| 50-80% FEV <sub>1</sub> predicted        | 0.99 (0.90 – 1.08) | 1.02 (0.93 – 1.13)   |
| 30-50% FEV <sub>1</sub> predicted        | 0.92 (0.83 – 1.02) | 0.99 (0.88 – 1.11)   |
| ≤30% FEV <sub>1</sub> predicted          | 1.02 (0.83 – 1.26) | 1.08 (0.86 – 1.36)   |

Table E12: Relationship between accelerated FEV<sub>1</sub> decline and risk of composite CVD stratified by gender, age, smoking status, AECOPD, mMRC, and airflow obstruction

\*p value <0.05; \*\*p value <0.0001

Table E13: Relationship between accelerated FEV1 decline and risk of composite CVD in patients with at least 4 FEV1 measurements during baseline period

| Exposure and covariates         | Unadjusted HR<br>95% CI | Adjusted HR*<br>(95% CI) |
|---------------------------------|-------------------------|--------------------------|
| <b>Accelerated FEV1 decline</b> | 1.02 (0.92 – 1.14)      | 1.04 (0.90 – 1.21)       |
| <b>AECOPD</b>                   |                         |                          |
| None                            | Ref                     | Ref                      |
| 1 moderate, 0 severe            | 1.11 (0.97 – 1.27)      | 1.17 (0.98 – 1.40)       |
| 2 moderate, 0 severe            | 1.20 (1.03 – 1.40)*     | 1.22 (0.99 – 1.50)       |
| ≥3 moderate, 0 severe           | 1.33 (1.17 – 1.51)**    | 1.46 (1.22 – 1.76)**     |
| 1 severe, any moderate          | 2.12 (1.75 – 2.58)**    | 2.07 (1.59 – 2.69)**     |
| ≥2 severe, any moderate         | 2.41 (1.72 – 3.39)**    | 2.17 (1.33 – 3.53)*      |
| <b>FEV1 % predicted</b>         |                         |                          |
| >80%                            | Ref                     | Ref                      |
| 50-80%                          | 1.00 (0.88 – 1.14)      | 1.09 (0.92 – 1.30)       |
| 30-50%                          | 1.09 (0.95 – 1.25)      | 1.39 (0.85 – 1.28)       |
| <30%                            | 1.00 (0.81 – 1.24)      | 1.02 (0.74 – 1.41)       |
| <b>Age</b>                      | 1.05 (1.04 – 1.05)**    | 1.05 (1.04 – 1.05)**     |
| <b>Men</b>                      | 1.51 (1.37 – 1.67)**    | 1.65 (1.43 – 1.90)**     |
| <b>Current smokers</b>          | 0.85 (0.77 – 0.93)*     | 1.23 (1.07 -1.42)*       |
| <b>BMI</b>                      |                         |                          |
| Normal                          | Ref                     | Ref                      |
| Underweight                     | 0.80 (0.60 – 1.07)      | 0.91 (0.62 – 1.32)       |
| Overweight                      | 1.01 (0.90 – 1.14)      | 0.88 (0.75 – 1.03)       |
| Obese                           | 1.01 (0.88 – 1.15)      | 0.97 (0.81 – 1.15)       |
| <b>mMRC</b>                     |                         |                          |
| 0                               | Ref                     | Ref                      |
| 1                               | 1.14 (0.94 – 1.38)      | 1.03 (0.84 – 1.26)       |
| 2                               | 1.55 (1.27 – 1.88)**    | 1.28 (1.03 – 1.58)*      |
| 3                               | 1.84 (1.48 – 2.29)**    | 1.49 (1.18 – 1.89)*      |
| 4                               | 2.35 (1.58 – 3.50)**    | 1.50 (0.97 – 2.31)       |
| <b>Asthma</b>                   | 0.90 (0.81 – 0.99)*     | 1.01 (0.89 – 1.16)       |

|                     |                      |                      |
|---------------------|----------------------|----------------------|
| <b>Hypertension</b> | 1.64 (1.49 – 1.81)** | 1.41 (1.22 – 1.62)** |
| <b>Diabetes</b>     | 1.40 (1.21 – 1.61)** | 1.19 (0.99 – 1.44)   |
| <b>Statin use</b>   | 1.39 (1.26 – 1.53)** | 1.02 (0.88 – 1.18)   |

\*p value <0.05; \*\*p value<0.0001

Table E14: Relationship between accelerated FEV1 decline and risk of composite CVD in patients with at least 2 FEV1 measurements at least 2 years apart.

| <b>Exposure and covariates</b>  | <b>Unadjusted HR<br/>95% CI</b> | <b>Adjusted HR*<br/>(95% CI)</b> |
|---------------------------------|---------------------------------|----------------------------------|
| <b>Accelerated FEV1 decline</b> | 1.07 (0.95 – 1.20)              | 0.95 (0.79 – 1.14)               |
| <b>AECOPD</b>                   |                                 |                                  |
| None                            | Ref                             | Ref                              |
| 1 moderate, 0 severe            | 1.05 (0.98 – 1.13)              | 0.95 (0.78 – 1.15)               |
| 2 moderate, 0 severe            | 1.14 (1.05 – 1.23)*             | 0.96 (0.75 – 1.22)               |
| ≥3 moderate, 0 severe           | 1.26 (1.17 – 1.35)**            | 1.13 (0.91 – 1.39)               |
| 1 severe, any moderate          | 1.90 (1.70 – 2.13)**            | 1.54 (1.11 -2.14)*               |
| ≥2 severe, any moderate         | 2.59 (2.13 – 3.16)**            | 1.63 (0.83 – 3.20)               |
| <b>FEV1 % predicted</b>         |                                 |                                  |
| >80%                            | Ref                             | Ref                              |
| 50-80%                          | 0.94 (0.77 – 1.15)              | 0.94 (0.77 – 1.15)               |
| 30-50%                          | 1.14 (0.91 – 1.43)              | 1.14 (0.91 – 1.43)               |
| <30%                            | 1.15 (1.07 – 1.24)**            | 1.33 (0.95 – 1.86)               |
| <b>Age</b>                      | 1.23 (1.10 – 1.38)**            |                                  |
| <b>Men</b>                      | 1.05 (1.-4 – 1.05)**            | 1.04(1.02 – 1.05)**              |
| <b>Current smokers</b>          | 1.33 (1.27 – 140)**             | 1.32 (1.12 – 1.55)*              |
| <b>BMI</b>                      | 0.82 (0.78 – 0.87)**            | 1.07 (0.91 – 1.26)               |
| Normal                          | Ref                             | Ref                              |
| Underweight                     | 1.04 (0.91 – 1.20)              | 1.19 (0.79 – 1.77)               |
| Overweight                      | 1.10 (1.03 – 1.18)*             | 1.23 (1.02 – 1.48)*              |
| Obese                           | 1.11 (1.04 – 1.19)*             | 1.11 (0.90 – 1.37)               |
| <b>mMRC</b>                     |                                 |                                  |
| 0                               | Ref                             | Ref                              |
| 1                               | 1.18 (1.07 – 1.30)*             | 1.13 (0.90 – 1.41)               |
| 2                               | 1.50 (1.35 – 1.66)**            | 1.39 (1.10 – 1.76)*              |
| 3                               | 1.94 (1.72 – 2.18)**            | 1.52 (1.15 – 2.01)*              |
| 4                               | 2.27 (1.82 – 2.82)**            | 1.76 (1.08 – 2.85)*              |
| <b>Asthma</b>                   | 0.92 (0.87 – 0.96)**            | 1.01 (0.86 – 1.18)               |



|                     |                      |                      |
|---------------------|----------------------|----------------------|
| <b>Hypertension</b> | 1.66 (1.58 – 1.74)** | 1.34 (1.14 – 1.59)** |
| <b>Diabetes</b>     | 1.39 (1.30 – 1.50)** | 1.06 (0.85 – 1.34)   |
| <b>Statin use</b>   | 1.40 (1.33 – 1.47)** | 1.29 (1.09 – 1.53)*  |

\*p value <0.05; \*\*p value<0.0001

Figure E1: Number of FEV<sub>1</sub> measurements over the three-year baseline period (N=36,382)

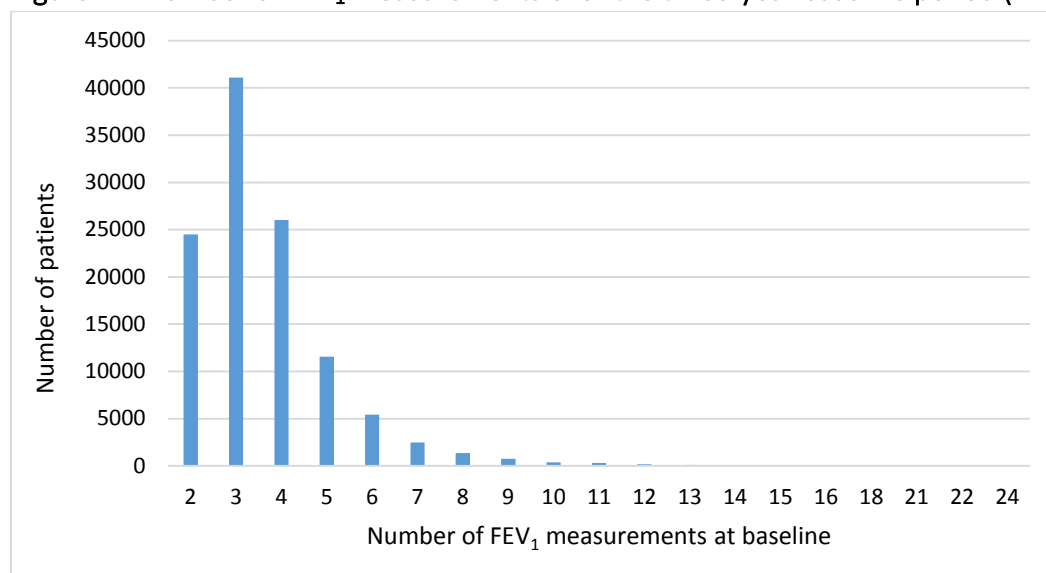

Figure E2: Time intervals between FEV<sub>1</sub> measurements over the three-year baseline period

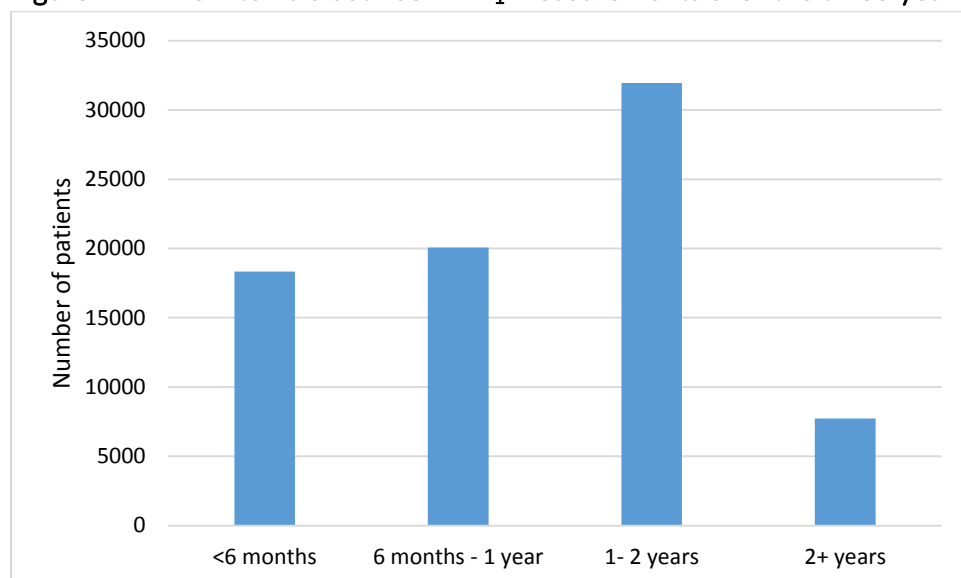

Figure E3: Spline regression with knots at the 10<sup>th</sup>, 50<sup>th</sup>, and 90<sup>th</sup> percentile

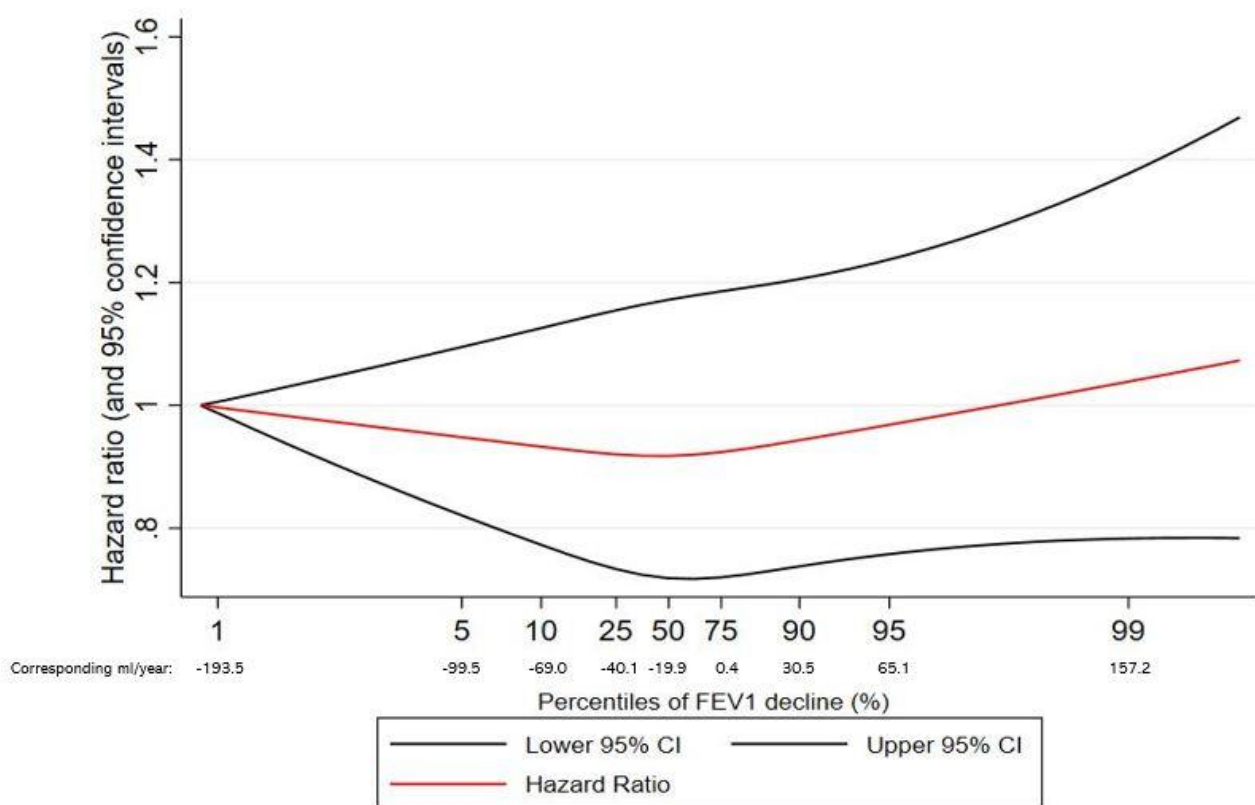

Figure E4: Association between composite CVD, heart failure, myocardial infarction, stroke, atrial fibrillation, and coronary artery disease and angina and accelerated FEV<sub>1</sub> decline compared to non-accelerated FEV<sub>1</sub> decline in the first year of follow-up.

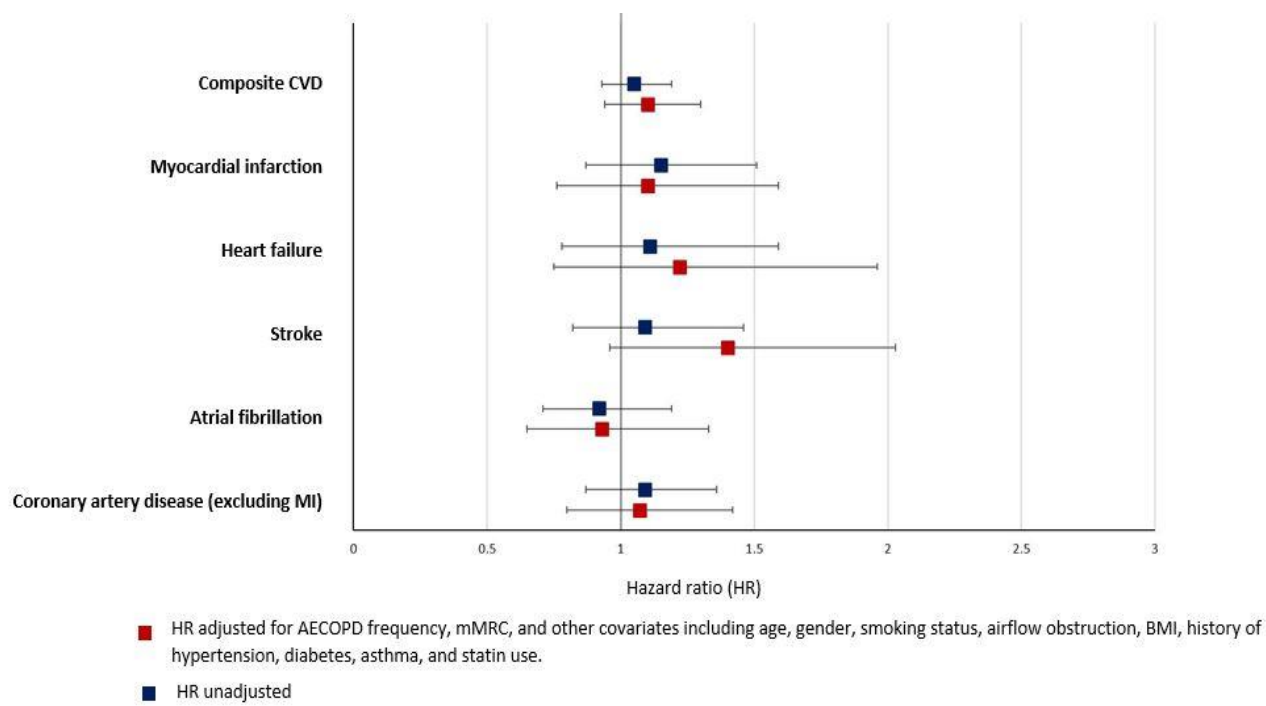

Figure E5: Rate of CVD in patients with accelerated FEV1 decline compared to non-accelerated FEV1 decline using multiple CVD events (IRR 95% CI)

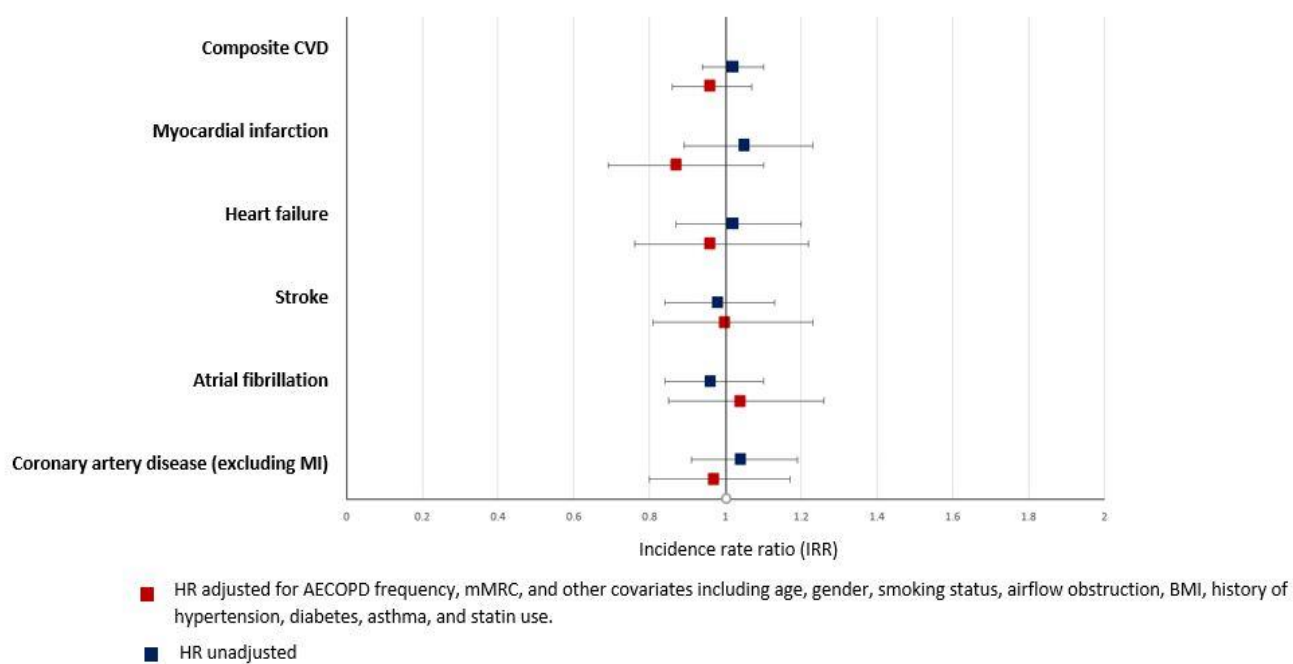

Supplement: inline-supplementary-material-1 [file inline-supplementary-material-1.pdf]
